# Supplementary material for: Signatures of immune cell infiltration for predicting immune escape and immunotherapy in cervical cancer
Source: Aging (Albany NY). 2023 Mar 13;15(5):1685–98. doi: 10.18632/aging.204583 (PMC10042703; doi:10.18632/aging.204583)
Supplement: Supplementary Table 1 [file aging-15-204583-s001.xlsx]

## Sheet: Supplementary Table 1
Supplementary Table 1. DEGs of ICI-clusters in the cohort.
ICI cluster B VS ICI cluster A								ICI cluster C VS ICI cluster A								ICI cluster C VS ICI cluster B
ID	LogFC	AveExpr	t	P.Value	adj.P.Val	B		ID	LogFC	AveExpr	t	P.Value	adj.P.Val	B		ID	LogFC	AveExpr	t	P.Value	adj.P.Val	B
IL1B	-2.05301	6.39773	-12.5044	7.65882e-31	1.06481e-26	58.7299		IL1B	-2.40579	6.39773	-13.8961	1.46762e-36	2.04043e-32	71.0993		GZMB	-1.2157	8.30899	-11.9948	8.13019e-29	1.13034e-24	53.8776
IL1A	-2.4537	5.62323	-11.5041	6.62995e-27	4.60881e-23	49.955		IL1A	-2.81349	5.62323	-12.5096	7.29893e-31	5.07385e-27	58.4967		GBP5	-1.05138	6.99747	-7.01307	9.02342e-12	1.05234e-08	16.2761
CSF2	-1.30092	4.36888	-10.1066	1.06244e-21	4.92369e-18	38.3585		CSF2	-1.4769	4.36888	-10.8811	1.54272e-24	7.14946e-21	44.4944		IDO1	-1.08336	6.95379	-6.38626	4.39183e-10	1.38772e-07	12.5791
GZMH	1.55439	6.75432	9.76671	1.70707e-20	5.93334e-17	35.6732		F3	-2.06917	7.35232	-10.2245	3.99915e-22	1.39e-18	39.1512
ITGAL	1.01734	7.87261	9.51983	1.23649e-19	3.43819e-16	33.7589		IL24	-1.31156	5.32131	-9.2071	1.44995e-18	4.03173e-15	31.2761
CD3D	1.24263	7.71432	9.38899	3.48563e-19	8.07678e-16	32.7572		SERPINE1	-1.76081	7.05397	-8.99293	7.58809e-18	1.75829e-14	29.6869
CD2	1.25052	7.02457	9.12515	2.7396e-18	5.44125e-15	30.765		SFTA1P	-1.44764	3.88123	-8.41118	5.95638e-16	1.18302e-12	25.5001
ZNF683	1.4056	6.51762	8.57364	1.79689e-16	3.12277e-13	26.7255		LAMC2	-1.5544	8.22069	-8.23595	2.13116e-15	3.70369e-12	24.2777
F3	-1.632	7.35232	-8.50358	3.01852e-16	4.19665e-13	26.225		CXCL2	-1.70256	6.32053	-7.74303	6.94261e-14	1.07248e-10	20.9402
APOC1	1.33022	8.58526	8.40387	6.28401e-16	7.94242e-13	25.5175		PTGS2	-1.50591	6.50164	-7.72567	7.82635e-14	1.0881e-10	20.8255
CD8A	1.19724	5.98078	8.35078	9.26295e-16	1.0238e-12	25.1432		TGFBI	-1.1652	8.85856	-7.60709	1.76542e-13	2.23133e-10	20.0468
CXCL2	-1.7404	6.32053	-8.34626	9.573e-16	1.0238e-12	25.1115		MMP1	-2.1716	6.9264	-7.51831	3.22656e-13	3.19203e-10	19.4698
NKG7	1.19989	8.13674	8.33542	1.03595e-15	1.02877e-12	25.0353		ITGA5	-1.02992	9.09697	-7.51325	3.33886e-13	3.19203e-10	19.4371
FEZ1	-1.02255	4.9782	-8.29213	1.41909e-15	1.2331e-12	24.7318		CCL20	-1.83764	6.34356	-7.49217	3.84982e-13	3.19203e-10	19.3008
G0S2	-1.52515	7.88677	-8.24307	2.02432e-15	1.49824e-12	24.3892		FST	-1.76501	5.77889	-7.42599	6.00723e-13	4.63992e-10	18.8752
LAMC2	-1.46918	8.22069	-8.20846	2.59871e-15	1.80649e-12	24.1483		CAV1	-1.27972	7.48288	-7.22021	2.3517e-12	1.63479e-09	17.5705
SERPINE1	-1.52014	7.05397	-8.18663	3.04082e-15	2.01317e-12	23.9969		MMP3	-1.77818	6.99992	-7.17196	3.22533e-12	2.1106e-09	17.2686
CXCR6	1.1898	5.7226	8.16281	3.60832e-15	2.28029e-12	23.8319		LAMA3	-1.25806	6.46233	-7.15834	3.52514e-12	2.13087e-09	17.1837
TBC1D10C	1.08304	6.41837	8.09627	5.80849e-15	3.51111e-12	23.3729		APOC1	1.18895	8.58526	7.1234	4.42518e-12	2.46093e-09	16.9664
APLN	-1.0909	4.55021	-8.05923	7.5626e-15	4.38095e-12	23.1185		TGFA	-1.01162	6.53821	-6.91786	1.65754e-11	8.2303e-09	15.7054
LAG3	1.27203	6.37308	7.88416	2.60127e-14	1.44662e-11	21.9281		G0S2	-1.33318	7.88677	-6.83332	2.82906e-11	1.31108e-08	15.1953
LAMA3	-1.26445	6.46233	-7.58656	2.03055e-13	9.73472e-11	19.9494		MT2A	-1.09738	10.4516	-6.78919	3.73236e-11	1.62159e-08	14.9309
CXCL1	-1.66592	7.93361	-7.56557	2.34219e-13	1.05044e-10	19.812		FOSL1	-1.20636	7.62959	-6.7208	5.71844e-11	2.33834e-08	14.524
CD27	1.03105	6.08958	7.39251	7.51541e-13	2.82397e-10	18.6903		HEPHL1	-1.08926	4.32325	-6.61106	1.12607e-10	4.11995e-08	13.8781
SFTA1P	-1.19743	3.88123	-7.33634	1.09252e-12	3.79732e-10	18.3305		LAMB3	-1.19874	8.99314	-6.5541	1.59529e-10	5.40958e-08	13.5462
CD38	1.02079	5.71158	7.32288	1.19457e-12	3.95431e-10	18.2447		SERPINB2	-1.67258	6.02882	-6.48081	2.48885e-10	7.68945e-08	13.1226
THBS1	-1.23368	6.8655	-7.08967	5.50706e-12	1.6185e-09	16.7759		YAP1	-1.02355	6.7277	-6.37702	4.64092e-10	1.24082e-07	12.5294
SLC39A14	-1.04572	6.29065	-7.02846	8.17373e-12	2.22822e-09	16.3967		IL6	-1.37505	5.02425	-6.31892	6.55525e-10	1.68773e-07	12.2008
CD48	1.01395	6.26697	6.97796	1.13002e-11	2.75627e-09	16.0857		ADRA2A	1.04844	6.06116	6.1718	1.55439e-09	3.72599e-07	11.3798
CAV1	-1.16901	7.48288	-6.95486	1.30969e-11	2.98502e-09	15.944		ERRFI1	-1.1692	7.12134	-6.15714	1.69249e-09	3.98826e-07	11.299
AFAP1L1	-1.0025	5.43394	-6.94139	1.42708e-11	3.2001e-09	15.8616		CCL19	1.37146	8.3548	6.08326	2.59322e-09	5.72278e-07	10.8936
TGFBI	-1.0064	8.85856	-6.92823	1.55178e-11	3.37101e-09	15.7812		CDH3	-1.09837	7.81104	-6.06306	2.91199e-09	6.22853e-07	10.7834
HLA-DOA	1.16541	6.86041	6.89108	1.9645e-11	4.07648e-09	15.5548		MMP10	-2.04109	6.59016	-6.0303	3.51218e-09	6.87744e-07	10.6055
C1QB	1.04167	9.42758	6.87003	2.24443e-11	4.45389e-09	15.427		CSF3	-1.35732	4.73565	-6.02604	3.59866e-09	6.94891e-07	10.5824
PDPN	-1.17189	7.85438	-6.86909	2.25771e-11	4.45389e-09	15.4213		SLC7A5	-1.03481	9.8105	-6.01352	3.86485e-09	7.36069e-07	10.5147
FN1	-1.29136	8.11527	-6.85427	2.47917e-11	4.72163e-09	15.3316		CXCL1	-1.3874	7.93361	-5.97523	4.80371e-09	8.6735e-07	10.3082
FADS3	-1.05494	5.49119	-6.82546	2.9725e-11	5.51022e-09	15.1574		PLAU	-1.08721	8.15433	-5.91024	6.93119e-09	1.10041e-06	9.96035
MT2A	-1.04531	10.4516	-6.81929	3.09009e-11	5.65283e-09	15.1202		NAPSB	1.06346	6.32895	5.90937	6.96512e-09	1.10041e-06	9.95572
HEPHL1	-1.05903	4.32325	-6.77776	4.00904e-11	7.05541e-09	14.8705		PTHLH	-1.46553	6.77021	-5.63641	3.13558e-08	3.92739e-06	8.53015
IL6	-1.39392	5.02425	-6.75457	4.63407e-11	7.76235e-09	14.7315		NT5E	-1.03465	6.08578	-5.61296	3.55873e-08	4.3401e-06	8.41036
YAP1	-1.02362	6.7277	-6.72484	5.57671e-11	9.23012e-09	14.5539		DUSP9	-1.03572	4.886	-5.48927	6.88897e-08	7.25586e-06	7.78572
MMP1	-1.83847	6.9264	-6.71168	6.05174e-11	9.78342e-09	14.4756		KRT17	-1.24879	12.7262	-5.44399	8.74693e-08	8.62658e-06	7.56009
PTGS2	-1.2398	6.50164	-6.70695	6.23217e-11	9.9593e-09	14.4474		MMP12	-1.14493	6.64486	-5.36932	1.29227e-07	1.15912e-05	7.19153
COL12A1	-1.02951	6.30201	-6.65853	8.40873e-11	1.31356e-08	14.1602		COL17A1	-1.53647	6.96566	-5.36416	1.32739e-07	1.17416e-05	7.16623
PXDN	-1.14014	6.692	-6.60877	1.14205e-10	1.72586e-08	13.8668		EFEMP1	-1.31281	7.2274	-5.36229	1.34034e-07	1.17416e-05	7.15706
PTHLH	-1.62656	6.77021	-6.59648	1.23143e-10	1.80216e-08	13.7946		IGFL1	-1.83007	6.4204	-5.34394	1.47412e-07	1.25735e-05	7.06726
NID1	-1.08299	7.44179	-6.58833	1.2944e-10	1.83632e-08	13.7468		CXCL14	1.47251	8.61776	5.2673	2.18705e-07	1.68925e-05	6.69513
NT5E	-1.14881	6.08578	-6.57175	1.43247e-10	1.97185e-08	13.6497		CA2	-1.10458	6.5125	-5.18665	3.29563e-07	2.33771e-05	6.30865
COL5A1	-1.10956	7.48308	-6.49924	2.2263e-10	2.89274e-08	13.2274		PPP1R14C	-1.19464	6.83883	-5.14114	4.1442e-07	2.77004e-05	6.09287
MMP10	-2.07729	6.59016	-6.47156	2.63178e-10	3.23802e-08	13.0671		ELN	1.07577	5.78242	5.13977	4.17271e-07	2.77575e-05	6.08642
FST	-1.45374	5.77889	-6.44955	3.00517e-10	3.6018e-08	12.9401		NFKBIA	-1.21971	10.0684	-5.06229	6.13954e-07	3.75417e-05	5.72297
DUSP9	-1.13523	4.886	-6.3444	5.63586e-10	6.07406e-08	12.3383		RNASE7	-1.36982	6.47544	-5.04831	6.5789e-07	3.95958e-05	5.65796
INHBA	-1.09	6.08917	-6.30226	7.23443e-10	7.38356e-08	12.0994		CXCL6	-1.09572	5.1929	-5.00632	8.0904e-07	4.42838e-05	5.4635
CX3CL1	1.18036	7.96298	6.24135	1.03553e-09	9.99787e-08	11.7564		GABRP	1.79083	6.69508	4.98569	8.951e-07	4.84225e-05	5.36849
CCL20	-1.44176	6.34356	-6.19833	1.33185e-09	1.2182e-07	11.5158		S100A12	-1.09604	5.41793	-4.89445	1.3938e-06	6.84733e-05	4.95256
APOE	1.08844	9.32509	6.18092	1.47402e-09	1.30531e-07	11.4189		BNC1	-1.06403	6.0163	-4.67894	3.86212e-06	0.000153415	3.99738
FOXC2	-1.03434	4.48353	-6.16607	1.60701e-09	1.39724e-07	11.3363		UCA1	-1.1975	5.80846	-4.66044	4.20774e-06	0.000164789	3.9172
CDH13	-1.04003	5.19196	-6.13551	1.91855e-09	1.62644e-07	11.167		KRT14	-2.03246	10.9376	-4.41109	1.29967e-05	0.000390265	2.86442
MMP3	-1.42735	6.99992	-6.07053	2.78992e-09	2.28166e-07	10.8094		PI3	-1.59794	9.1183	-4.37606	1.51653e-05	0.000435627	2.72073
APCDD1L	-1.02668	5.49281	-6.03298	3.45884e-09	2.7479e-07	10.6041		HAS3	-1.01558	6.77206	-4.35587	1.65674e-05	0.000462524	2.63843
CXCL9	1.34381	6.70059	6.01328	3.87005e-09	3.03118e-07	10.4969		CRCT1	-1.4049	5.70814	-4.33355	1.82629e-05	0.000498407	2.54779
DLL1	-1.01342	6.29242	-5.96777	5.01101e-09	3.72889e-07	10.2503		TGM1	-1.22442	7.24805	-4.27521	2.3512e-05	0.000616579	2.31294
CXCL6	-1.23489	5.1929	-5.94949	5.55656e-09	4.04465e-07	10.1517		COMP	1.17051	6.79396	4.25849	2.52634e-05	0.000644473	2.2462
CSF3	-1.26584	4.73565	-5.92601	6.34324e-09	4.43247e-07	10.0254		KRT6A	-1.32372	12.0286	-4.21809	3.00263e-05	0.000733666	2.08585
CXCL13	1.23303	6.41401	5.92598	6.3444e-09	4.43247e-07	10.0252		SCNN1B	1.02446	5.94893	4.13347	4.29229e-05	0.000967192	1.75455
NNMT	-1.23541	7.39596	-5.91878	6.60653e-09	4.542e-07	9.98658		ALDH1A1	1.04909	7.69859	4.05743	5.88703e-05	0.00123264	1.46215
PPP1R14C	-1.30414	6.83883	-5.9181	6.63185e-09	4.542e-07	9.98294		S100A2	-1.12926	10.6395	-4.01462	7.01776e-05	0.00140791	1.29976
LAMB3	-1.00862	8.99314	-5.81505	1.17903e-08	7.65985e-07	9.43431		SPRR2D	-1.416	6.25376	-4.01004	7.15044e-05	0.00142834	1.28246
GBP5	1.15771	6.99747	5.79233	1.33702e-08	8.29845e-07	9.31447		DAPL1	1.21668	7.37301	3.79616	0.000167924	0.00266209	0.495911
EFEMP1	-1.33917	7.2274	-5.76794	1.52959e-08	9.20604e-07	9.18626		S100A7	-1.58446	7.51032	-3.69475	0.000248321	0.00351822	0.137019
IDO1	1.29705	6.95379	5.73504	1.83271e-08	1.08426e-06	9.01404		GJB2	-1.03031	8.29203	-3.62217	0.00032679	0.00422605	-0.114253
SLAMF8	1.05046	6.96728	5.61985	3.42884e-08	1.83351e-06	8.41772		SPRR2E	-1.52339	7.60273	-3.53304	0.000455022	0.00539776	-0.416405
SERPINB7	-1.05172	5.11711	-5.51275	6.08267e-08	2.95351e-06	7.8726		MMP13	-1.02865	5.28018	-3.51794	0.000480941	0.00563788	-0.466886
GABRP	1.86838	6.69508	5.48494	7.04857e-08	3.31068e-06	7.73254		SPRR2A	-1.37432	7.42453	-3.37687	0.000799419	0.00818433	-0.928676
LIF	-1.02052	5.95951	-5.46397	7.87351e-08	3.64885e-06	7.62738		SERPINB13	-1.10336	8.81141	-3.3431	0.000900508	0.00885174	-1.03655
CXCL10	1.29313	8.52072	5.33855	1.5158e-07	6.25347e-06	7.00549		SERPINB3	-1.12373	9.41703	-3.30894	0.00101478	0.00967	-1.14464
SERPINB2	-1.29515	6.02882	-5.29175	1.9294e-07	7.75271e-06	6.77664		CA9	-1.01421	7.14845	-3.30367	0.00103358	0.00978209	-1.16123
CCDC8	-1.06298	5.84233	-5.26674	2.19329e-07	8.58967e-06	6.65509		CASP14	-1.18162	6.16103	-2.87092	0.0042937	0.0269826	-2.43665
IGFL1	-1.66861	6.4204	-5.1379	4.21216e-07	1.45314e-05	6.03687
KRT17	-1.08786	12.7262	-5.00072	8.31547e-07	2.58058e-05	5.39357
COL17A1	-1.34623	6.96566	-4.95599	1.03466e-06	3.12037e-05	5.18711
CCL19	1.05281	8.3548	4.92423	1.20714e-06	3.56323e-05	5.04153
RRAD	-1.00521	5.7339	-4.74804	2.79708e-06	7.26875e-05	4.24919
CDA	-1.08925	7.12877	-4.7261	3.10015e-06	7.89403e-05	4.15233
UCA1	-1.07733	5.80846	-4.42116	1.24302e-05	0.000253076	2.84826
HLA-DRB5	1.02953	7.97123	4.37269	1.53912e-05	0.000303093	2.64823
SNCG	-1.05059	7.24051	-4.31835	1.95104e-05	0.000363611	2.42642
CXCL14	1.13534	8.61776	4.28241	2.27937e-05	0.000413709	2.28108
PI3	-1.45545	9.1183	-4.20295	3.20232e-05	0.000547624	1.96376
MMP13	-1.15093	5.28018	-4.15055	3.99552e-05	0.000645048	1.75749
KLK5	-1.13291	4.96529	-4.13227	4.3139e-05	0.00068542	1.68608
DAPL1	1.22814	7.37301	4.04064	6.3082e-05	0.000919317	1.33259
RNASE7	-1.02576	6.47544	-3.98624	7.87799e-05	0.00109418	1.12621
CRCT1	-1.13932	5.70814	-3.70577	0.000238091	0.00260644	0.103441
CA9	-1.06783	7.14845	-3.66782	0.0002751	0.00291074	-0.0295736
S100A7	-1.38649	7.51032	-3.40923	0.000712526	0.00624606	-0.90167
KRT15	1.03441	9.44895	3.15588	0.0017119	0.0122305	-1.69748
SPRR2D	-1.02698	6.25376	-3.06676	0.00229962	0.0152246	-1.96349
CASP14	-1.18832	6.16103	-3.04447	0.00247318	0.016143	-2.0289
KRT14	-1.22501	10.9376	-2.80349	0.00528261	0.0290983	-2.70663
